# Supplementary material for: Marine ecosystem shifts with deglacial sea-ice loss inferred from ancient DNA shotgun sequencing
Source: Nat Commun. 2023 Mar 24;14:1650. doi: 10.1038/s41467-023-36845-x (PMC10039020; doi:10.1038/s41467-023-36845-x)
Supplement: Supplementary file 4 — Supplementary Data 1–2 [file 41467_2023_36845_MOESM4_ESM.xlsx]

## Sheet: Supplementary_Data_1
Supplementary Data 1: Processing steps of sequencing data showing how many read counts are retained at each step for each sample, extraction blank (EB) or library blank (LB).
			raw data				deduplication				filtering & trimming							classification				Taxonomic filter and resampling
file_name	Depth interval (cm)	Age (cal kyr BP)	total read counts	Read1 counts	Read2 counts	read pairs	total read count after deduplication	Read1 counts after deduplication	Read2 counts after deduplication	duplication rate (%)	Merged reads after filtering	total read count after filter	reads failed due to low quality	reads failed due to too many N	reads failed due to too short	reads failed due to low complexity	Proportion of original read pairs after filtering&trimming (%)	classified merged	classified unmerged	merged, classified on family level	unmerged, classified on family level	Pelagic (family level)	Benthic (family level)	Pelagic resampling	Benthic resampling
191011_SND405_A_L007_APMG-6-1	903-902	19.9	62809838	31404919	31404919	31404919	61362424	30681212	30681212	2.30444	26192029	57936110	36	2966	3421800	1512	83.401	26192029	2776026	328617	18563	10171	3344	6593	1839
191011_SND405_A_L007_APMG-6-2	724-725	16.5	61404384	30702192	30702192	30158416	59362258	29681129	29681129	3.3257	26028522	54876132	34	2890	4480498	2704	84.7774	26028522	1409544	1201795	62588	13911	3885	6593	1839
191011_SND405_A_L007_APMG-6-3	597-596	14.03	60579524	30289762	30289762	30289762	60063678	30031839	30031839	0.851519	24948857	56360200	26	2922	3697658	2872	82.3673	24948857	3231243	706841	67133	9647	2484	6593	1839
191011_SND405_A_L007_APMG-6-4	449.5-450.5	12.61	64239222	32119611	32119611	32119611	62961186	31480593	31480593	1.98949	24229729	56741130	22	3218	6211752	5064	75.4359	24229729	4140836	216909	6822	13578	3296	6593	1839
191011_SND405_A_L007_APMG-6-6	114-115	5.6	61090532	30545266	30545266	30545266	60420496	30210248	30210248	1.09679	25061813	56379742	14	2626	4037078	1036	82.0481	25061813	3128058	155611	3763	6640	1879	6593	1839
191011_SND405_A_L007_APMG-6-7	EB (EH388, EH417, EH427, EH372, EH407)	EB	790768	395384	395384	395384	790720	395360	395360	0.00607005	5405	11366	0	0	779352	2	1.36703	5405	278	228	18	NA	NA	NA	NA
191011_SND405_A_L007_APMG-6-8	LB	LB	976582	488291	488291	488291	976510	488255	488255	0.00737265	5283	10954	0	0	965554	2	1.08194	5283	194	206	15	NA	NA	NA	NA
200313_A00902_A_L001_APMG-8-1	871-870	19.3	80603232	40301616	40301616	40301616	72694040	36347020	36347020	9.8125	22637965	58878082	6	4846	13802188	8918	56.1714	22637965	6801076	352886	32850	14645	3573	6593	1839
200313_A00902_A_L001_APMG-8-10	362-361	11.56	67672998	33836499	33836499	33836499	63010810	31505405	31505405	6.88929	22115242	55660890	2	4520	7340318	5080	65.3591	22115242	5715203	247577	12586	12235	3197	6593	1839
200313_A00902_A_L001_APMG-8-11	314-313	11.17	72874308	36437154	36437154	36437154	69315656	34657828	34657828	4.88327	25956725	59837196	2	4816	9469714	3928	71.237	25956725	3961873	373791	19880	15042	4483	6593	1839
200313_A00902_A_L001_APMG-8-12	277-276	10.73	87265758	43632879	43632879	43632879	80652374	40326187	40326187	7.57844	29812568	69251484	0	5530	11389694	5666	68.3259	29812568	4813174	318688	5356	16488	4789	6593	1839
200313_A00902_A_L001_APMG-8-2	808-807	18.39	60316832	30158416	30158416	30158416	56244680	28122340	28122340	6.75127	20983209	48865442	0	3842	7368086	7310	69.5766	20983209	3449512	1471456	147734	14075	3826	6593	1839
200313_A00902_A_L001_APMG-8-3	757-756	17.34	75712476	37856238	37856238	37856238	70241356	35120678	35120678	7.22618	25079251	61350064	2	4954	8877140	9196	66.2487	25079251	5595781	994021	165138	16371	4375	6593	1839
200313_A00902_A_L001_APMG-8-4	693-692	15.91	86041796	43020898	43020898	43020898	81788616	40894308	40894308	4.94316	29576084	69271678	2	5136	12487038	24762	68.7482	29576084	5059755	709513	124018	28318	5643	6593	1839
200313_A00902_A_L001_APMG-8-5	677-676	15.58	71047802	35523901	35523901	35523901	68271158	34135579	34135579	3.90813	25180525	58879590	2	4668	9369982	16916	70.8833	25180525	4259270	916778	188946	21327	4429	6593	1839
200313_A00902_A_L001_APMG-8-6	533-532	13.62	68431296	34215648	34215648	34215648	65625284	32812642	32812642	4.10048	23770077	54476148	0	4216	11141026	3894	69.4714	23770077	3467997	623614	56769	14850	5266	6593	1839
200313_A00902_A_L001_APMG-8-7	EB (EH437, EH457)	EB	4989388	2494694	2494694	2494694	4353440	2176720	2176720	12.746	53412	130772	6	14	4222630	18	2.14102	53412	11974	524	16	NA	NA	NA	NA
200313_A00902_A_L001_APMG-8-9	410-409	12.13	69344202	34672101	34672101	34672101	65829968	32914984	32914984	5.06781	23416237	59083194	0	5034	6738374	3366	67.5363	23416237	6125360	202107	5072	12364	3784	6593	1839
200313_A00902_A_L002_APMG-9-1	229-228	9.84	64973132	32486566	32486566	32486566	63827346	31913673	31913673	1.76348	24401299	55057242	2	4054	8761936	4112	75.112	24401299	3127322	235432	5810	15308	4255	6593	1839
200313_A00902_A_L002_APMG-9-10	19-18	1.75	88516332	44258166	44258166	44258166	82331316	41165658	41165658	6.98743	28820594	71606598	0	5946	10715022	3750	65.1193	28820594	6982705	308148	33511	12586	3488	6593	1839
200313_A00902_A_L002_APMG-9-11	2.5-3.5	1.08	88027718	44013859	44013859	44013859	85874484	42937242	42937242	2.44609	27341022	68896950	2	5544	16966632	5356	62.1191	27341022	7107453	359153	52236	20018	7528	6593	1839
200313_A00902_A_L002_APMG-9-12	LB2	LB	7292248	3646124	3646124	3646124	6936810	3468405	3468405	4.87419	13600	31068	0	0	6905710	32	0.372999	13600	1934	218	7	NA	NA	NA	NA
200313_A00902_A_L002_APMG-9-13	LB3	LB	5461610	2730805	2730805	2730805	4969788	2484894	2484894	9.00507	8695	18824	0	0	4950948	16	0.318404	8695	717	105	6	NA	NA	NA	NA
200313_A00902_A_L002_APMG-9-2	180-181	8.29	66083604	33041802	33041802	33041802	64552002	32276001	32276001	2.31767	24114327	55515978	2	4296	9027720	4006	72.9813	24114327	3643662	606689	39528	12903	3788	6593	1839
200313_A00902_A_L002_APMG-9-3	163-162	7.56	83278632	41639316	41639316	41639316	79378252	39689126	39689126	4.68353	32459523	71944598	0	5198	7424388	4068	77.954	32459523	3512776	300833	3728	18503	4884	6593	1839
200313_A00902_A_L002_APMG-9-4	LB1	LB	6276374	3138187	3138187	3138187	4379040	2189520	2189520	30.2298	12002	26668	4	2	4352342	24	0.38245	12002	1332	177	10	NA	NA	NA	NA
200313_A00902_A_L002_APMG-9-5	131-130	6.26	71766254	35883127	35883127	35883127	69687722	34843861	34843861	2.89625	27050541	61374860	0	4596	8303498	4768	75.3851	27050541	3636889	322173	12346	15089	4194	6593	1839
200313_A00902_A_L002_APMG-9-6	83-82	4.31	72002882	36001441	36001441	36001441	68076760	34038380	34038380	5.45273	23152971	57103524	6	4692	10964342	4196	64.3112	23152971	5398791	193191	3896	11056	2986	6593	1839
200313_A00902_A_L002_APMG-9-7	67-66	3.66	82548152	41274076	41274076	41274076	78426636	39213318	39213318	4.99286	26352016	64652862	0	5178	13764392	4204	63.8464	26352016	5974415	265479	5852	11858	3340	6593	1839
200313_A00902_A_L002_APMG-9-8	49.5-50.5	2.99	68043718	34021859	34021859	34021859	66354906	33177453	33177453	2.48195	21277285	51016532	2	4090	15329152	5130	62.54	21277285	4230981	214211	5317	10894	2964	6593	1839
200313_A00902_A_L002_APMG-9-9	35-34	2.36	75911310	37955655	37955655	37955655	73938774	36969387	36969387	2.59847	25797342	63579636	0	5354	10350556	3228	67.9671	25797324	5992494	354728	59463	9813	2688	6593	1839

## Sheet: Supplementary_Data_2
Supplementary Data 2: This file contains the list of families, their grouping into habitat (pelagic/benthic) and trophic status (phototrophic/heterotrophic), the taxonomic group to which the family belongs, the resampled number of read counts used for the formal analysis, links (edges) in the pelagic network, and Spearman correlation coefficients (ρ>0.2) and Benjamini-Hochberg adjusted p-values b…
Family name	habitat, trophic status	taxonomic group	Resampled sum of read counts	Links in pelagic network	SST Spearman's rho	SST adjusted p-value	IP25 Spearman's rho	IP25 adjusted p-value
Acanthasteridae	benthic	Echinodermata	444.35
Acanthocerataceae	plankton, phototrophic	Diatoms-centric	39.98	3			-0.594013	0.0541017
Acaryochloridaceae	plankton, phototrophic bacteria	Cyanobacteria	109.04	3
Acipenseridae	pelagic	Fish	701.86	5
Acroporidae	benthic	Cnidaria-Anthozoa-Hexacorallia	666.93
Actiniidae	benthic	Cnidaria-Anthozoa-Hexacorallia	498.19
Aglajidae	benthic	Mollusca-Gastropoda	21.59
Aiptasiidae	benthic	Cnidaria-Anthozoa-Hexacorallia	402.53
Alariaceae	benthic	Phaeophyceae	17.4
Amphipleuraceae	plankton, phototrophic	Diatoms-pennate	46.99	9	-0.530204	0.105256
Ampullariidae	benthic	Mollusca-Gastropoda	610.68
Anarhichadidae	pelagic	Fish	461.94	2
Anaulaceae	plankton, phototrophic	Diatoms-centric	47.5	4
Anguillidae	pelagic	Fish	512.12	1
Aphanizomenonaceae	plankton, phototrophic bacteria	Cyanobacteria	896.72	6
Aphanothecaceae	plankton, phototrophic bacteria	Cyanobacteria	934.84	6
Aplysiidae	benthic	Mollusca-Gastropoda	1919.08
Apogonidae	pelagic	Fish	7264.59	8
Apusomonadidae	plankton, heterotrophic	Protozoa	220.23	1
Arcidae	benthic	Mollusca-Bivalvia	31.39
Ascidiidae	benthic	Tunicata	196.94
Asteriidae	benthic	Echinodermata	3234.05
Asterinidae	benthic	Echinodermata	372.82
Attheyaceae	plankton, phototrophic	Diatoms-centric	234.47	20	-0.529231	0.106043	0.47806	0.167617
Bacillariaceae	plankton, phototrophic	Diatoms-pennate	1236.38	21	-0.720523	0.00668586	0.686044	0.013339
Balaenopteridae	pelagic	Mammals	466.58	6
Bangiaceae	benthic	Rhodophyta	59.92		0.647286	0.166766
Bathycoccaceae	plankton, phototrophic	Chlorophyta	2777.37	20	-0.700769	0.009956	0.691301	0.0119953
Batrachoididae	pelagic	Fish	4067.93	9
Batrachospermaceae	benthic	Rhodophyta	27.29
Biddulphiaceae	plankton, phototrophic	Diatoms-centric	39.18	5
Blenniidae	pelagic	Fish	4177.12	11	0.608462	0.0449155
Boldiaceae	benthic	Rhodophyta	32.92
Bovichtidae	pelagic	Fish	3835.63	7	0.48	0.165521
Brachionidae	pelagic	Rotifera	34.03	1
Bracteacoccaceae	plankton, phototrophic	Chlorophyta	14.05	0
Bryopsidaceae	plankton, phototrophic	Chlorophyta	22.06	0
Calanidae	pelagic	Crustaceae-Calanoid copepods	43.64	8			0.469773	0.177484
Callorhinchidae	pelagic	Chondrychthyes	501.17	2
Calotrichaceae	plankton, phototrophic bacteria	Cyanobacteria	1453.92	10
Carangidae	pelagic	Fish	4382.33	14
Ceramiaceae	benthic	Rhodophyta	89.82
Chaetocerotaceae	plankton, phototrophic	Diatoms-centric	1489.33	3	0.647692	0.0251759	-0.755197	0.00278888
Chamaesiphonaceae	plankton, phototrophic bacteria	Cyanobacteria	201.56	0
Champiaceae	benthic	Rhodophyta	15.86
Channichthyidae	pelagic	Fish	4373.49	14
Chlamydomonadaceae	plankton, phototrophic	Chlorophyta	376.25	1
Chlorellaceae	plankton, phototrophic	Chlorophyta	324.49	4	0.632814	0.0317642	-0.512031	0.1247
Chlorobiaceae	plankton, phototrophic bacteria	Chlorobi	1252.69	8	0.557692	0.0813952	-0.587375	0.0579604
Chlorococcaceae	plankton, phototrophic	Chlorophyta	13.72	3			-0.457686	0.192039
Chlorodendraceae	plankton, phototrophic	Chlorophyta	14.51	1
Chloroflexaceae	plankton, phototrophic bacteria	Chloroflexi	191.87	3
Chloropicaceae	plankton, phototrophic	Chlorophyta	308.35	1
Chromulinaceae	plankton, phototrophic	Stramenopiles-Chrysophyceae	14.78	0
Chroococcaceae	plankton, phototrophic bacteria	Cyanobacteria	513.58	3
Chroococcidiopsidaceae	plankton, phototrophic bacteria	Cyanobacteria	250.66	6
Chroomonadaceae	plankton, phototrophic	Cryptophyceae	28.72	0	-0.484868	0.159984
Cionidae	benthic	Tunicata	318.5
Clupeidae	pelagic	Fish	1433.6	6	0.481538	0.162876	-0.487298	0.157307
Coelacanthidae	pelagic	Chondrychthyes	401.32	3
Coleofasciculaceae	plankton, phototrophic bacteria	Cyanobacteria	106.52	6
Comatulidae	benthic	Echinodermata	546.28
Corallinaceae	benthic	Rhodophyta	20.03
Coscinodiscaceae	plankton, phototrophic	Diatoms-centric	76.61	2
Cyanidiaceae	plankton, phototrophic	Rhodophyta	189.84	5
Cyanothecaceae	plankton, phototrophic bacteria	Cyanobacteria	76.26	2
Cyclopteridae	pelagic	Fish	401.5	3
Cymatosiraceae	plankton, phototrophic	Diatoms-pennate	57.72	17	-0.468822	0.17961
Daphniidae	benthic	Crustaceae-Cladocera	439.45
Delesseriaceae	benthic	Rhodophyta	108.82
Delphinidae	pelagic	Mammals	523.12	3
Dermocarpellaceae	plankton, phototrophic bacteria	Cyanobacteria	263.95	4
Desmidiaceae	plankton, phototrophic	Charophyceae	36.33	4	0.525789	0.108592	-0.488444	0.156316
Dictyotaceae	benthic	Phaeophyceae	35.77
Dugesiidae	benthic	Plathyhelminthes	46.74
Echinometridae	benthic	Echinodermata	37.28
Edwardsiidae	benthic	Cnidaria-Anthozoa-Hexacorallia	491.95
Eirenidae	pelagic	Cnidaria	12.72	6
Endocladiaceae	benthic	Rhodophyta	8.77
Engraulidae	pelagic	Fish	11.21	0
Entomoneidaceae	plankton, phototrophic	Diatoms-pennate	29.53	4
Eucalanidae	pelagic	Crustaceae-Calanoid copepods	29.17	2	0.458991	0.19027
Euglenaceae	plankton, phototrophic	Discoba	54.5	1
Eunotiaceae	plankton, phototrophic	Diatoms-pennate	21.94	3
Euplotidae	plankton, heterotrophic	Alveolata-Ciliophora	34.72	0
Fonticulaceae	plankton, heterotrophic	Opisthokonta	120.33	5	0.492402	0.150602	-0.458133	0.191395
Fragilariaceae	plankton, phototrophic	Diatoms-pennate	91.8	16	-0.633583	0.0314511	0.53282	0.103789
Fundulidae	pelagic	Fish	429.91	5
Gadidae	pelagic	Fish	9849.56	19	-0.740769	0.0043287	0.719785	0.00668586
Gasterosteidae	pelagic	Fish	769.28	1
Gelidiaceae	benthic	Rhodophyta	26.72
Geminigeraceae	plankton, phototrophic	Cryptophyceae	390.98	1
Gigartinaceae	benthic	Rhodophyta	108.59
Gloeobacteraceae	plankton, phototrophic bacteria	Cyanobacteria	222.95	3	0.465385	0.184081	-0.532718	0.103814
Gloeomargaritaceae	plankton, phototrophic bacteria	Cyanobacteria	83.79	2
Gobiidae	pelagic	Fish	603.66	8
Golenkiniaceae	plankton, phototrophic	Chlorophyta	11.93	0
Gomontiellaceae	plankton, phototrophic bacteria	Cyanobacteria	126.26	1
Gomphonemataceae	plankton, phototrophic	Diatoms-pennate	53.12	1
Gonyaulacaceae	plankton, heterotrophic	Dinoflagellata	28.13	0
Gracilariaceae	benthic	Rhodophyta	70.86
Gymnodiniaceae	plankton, heterotrophic	Dinoflagellata	27.84	1
Haematococcaceae	plankton, phototrophic	Chlorophyta	33.32	2
Halimedaceae	plankton, phototrophic	Chlorophyta	55.36	0
Haliotidae	benthic	Mollusca-Gastropoda	35.33
Hapalosiphonaceae	plankton, phototrophic bacteria	Cyanobacteria	212.42	2
Heliobacteriaceae	plankton, phototrophic bacteria	Firmicutes	423.41	3
Hemiaulaceae	plankton, phototrophic	Diatoms-centric	210.4	12
Hexamitidae	plankton, heterotrophic	Diplomonadida	55.51	1
Hildenbrandiaceae	benthic	Rhodophyta	31.09
Histionidae	plankton, phototrophic	Discoba	21.36	1
Holocentridae	pelagic	Fish	9156.36	16	-0.512308	0.12422
Hyalellidae	benthic	Crustacea-Amphipoda	479.62
Hyalidae	benthic	Crustacea-Amphipoda	33.46
Hydridae	pelagic	Cnidaria	317	2
Hydrodictyaceae	plankton, phototrophic	Chlorophyta	24.71	0
Hyellaceae	plankton, phototrophic bacteria	Cyanobacteria	91.97	5	0.648316	0.0251221	-0.468118	0.180312
Klebsormidiaceae	plankton, phototrophic	Charophyceae	53.49	5	0.595442	0.0534122	-0.637676	0.0292686
Koliellaceae	plankton, phototrophic	Chlorophyta	21.05	0
Kryptoperidiniaceae	plankton, heterotrophic	Dinoflagellata	35.76	19
Laminariaceae	benthic	Phaeophyceae	141.85
Lateolabracidae	pelagic	Fish	4198.58	8
Leptocylindraceae	plankton, phototrophic	Diatoms-centric	72.06	1
Leptolyngbyaceae	plankton, phototrophic bacteria	Cyanobacteria	546.34	9
Liagoraceae	benthic	Rhodophyta	109.04
Limulidae	benthic	Chelicerata	559.4
Lingulidae	benthic	Brachiopoda	385.51
Lithodesmiaceae	plankton, phototrophic	Diatoms-centric	40.91	5
Lottiidae	benthic	Mollusca-Gastropoda	296.41
Lumbricidae	benthic	Annelida	18.71
Lysianassidae	benthic	Crustacea-Amphipoda	5.71
Mamiellaceae	plankton, phototrophic	Chlorophyta	788.42	3
Merismopediaceae	plankton, phototrophic bacteria	Cyanobacteria	116.53	9	0.466923	0.182111
Merulinidae	benthic	Cnidaria-Anthozoa-Hexacorallia	467.81
Metridinidae	pelagic	Crustaceae-Calanoid copepods	50.58	15	-0.708237	0.0083325	0.622111	0.0368421
Microcoleaceae	plankton, phototrophic bacteria	Cyanobacteria	624.18	7
Microcystaceae	plankton, phototrophic bacteria	Cyanobacteria	380.11	5	0.577692	0.0658574	-0.568129	0.0732441
Monodontidae	pelagic	Mammals	230.43	0
Monodopsidaceae	plankton, phototrophic	Stramenopiles-Eustigmatophyceae	381.32	2
Mustelidae	pelagic	Mammals	4860.05	16	0.734615	0.00472657	-0.693611	0.0116527
Mytilidae	benthic	Mollusca-Bivalvia	288.73
Myxinidae	pelagic	Chondrychthyes	50.38	1
Naviculaceae	plankton, phototrophic	Diatoms-pennate	124.19	10	-0.614615	0.0414097	0.509623	0.127403
Nephroselmidaceae	plankton, phototrophic	Chlorophyta	28.81	5	0.535583	0.101189	-0.565159	0.0760252
Nephtheidae	benthic	Cnidaria-Anthozoa-Octocorallia	377.69
Niphatidae	benthic	Porifera	370.6
Noelaerhabdaceae	plankton, phototrophic	Haptophyta/Prymnesiophyta	692.67	3	0.453846	0.19667
Nostocaceae	plankton, phototrophic bacteria	Cyanobacteria	2893.81	10
Octopodidae	pelagic	Mollusca	566.37	6
Oculatellaceae	plankton, phototrophic	Chlorophyta	94.78	3
Oscillatoriaceae	plankton, phototrophic bacteria	Cyanobacteria	691.68	6
Ostreidae	benthic	Mollusca-Bivalvia	7611.76
Ostreobiaceae	plankton, phototrophic	Chlorophyta	46.58	4
Otariidae	pelagic	Mammals	242.07	2
Oxystominidae	benthic	Nematoda	43.48
Oxytrichidae	plankton, heterotrophic	Alveolata-Ciliophora	49.27	10	-0.738746	0.0046105	0.756642	0.00278888
Palaemonidae	benthic	Crustacea-Decapoda	10983.9
Paralichthyidae	pelagic	Fish	346.33	2
Parameciidae	plankton, heterotrophic	Alveolata-Ciliophora	567.18	5
Parastacidae	benthic	Crustacea-Decapoda	25.89
Paulinellidae	plankton, phototrophic	Rhizaria-Imbricatea	62.75	2
Pectinidae	benthic	Mollusca-Bivalvia	6440.41
Pedinomonadaceae	plankton, phototrophic	Chlorophyta	14.53	2
Pelagiidae	pelagic	Cnidaria	40.28	2
Penaeidae	benthic	Crustacea-Decapoda	1631.95
Perkinsidae	plankton, heterotrophic	Alveolata-Perkinsozoa	99.03	0
Petromyzontidae	pelagic	Chondrychthyes	589.97	3
Phaeocystaceae	plankton, phototrophic	Haptophyta/Prymnesiophyta	1025.53	17	-0.683846	0.0139834	0.588145	0.057217
Phaeodactylaceae	plankton, phototrophic	Diatoms-pennate	164.36	3
Phocidae	pelagic	Mammals	680.17	8
Phocoenidae	pelagic	Mammals	206.24	0
Physeteridae	pelagic	Mammals	172.67	0
Plagiogrammaceae	plankton, phototrophic	Diatoms-centric	54.15	1
Pleuronectidae	pelagic	Fish	353.14	3	0.513077	0.123817	-0.474211	0.171637
Pocilloporidae	benthic	Cnidaria-Anthozoa-Hexacorallia	863.73
Pollicipedidae	benthic	Crustacea-Cirripedia	238.06
Porphyridiaceae	benthic	Rhodophyta	16.16
Prasinococcaceae	plankton, phototrophic	Chlorophyta	12.77	0
Priapulidae	benthic	Ecdysozoa	1393.01
Prochloraceae	plankton, phototrophic bacteria	Cyanobacteria	727.13	7
Prochlorotrichaceae	plankton, phototrophic bacteria	Cyanobacteria	94.32	4
Pseudanabaenaceae	plankton, phototrophic bacteria	Cyanobacteria	280.69	3
Pterocladiaceae	benthic	Rhodophyta	11.51
Pycnococcaceae	plankton, phototrophic	Chlorophyta	94.98	3	-0.530223	0.105256
Pyramimonadaceae	plankton, phototrophic	Chlorophyta	35.96	0
Radiococcaceae	plankton, phototrophic	Chlorophyta	29.6	1
Rajidae	pelagic	Chondrychthyes	551.94	6
Rhincodontidae	pelagic	Chondrychthyes	247.48	2	0.526923	0.107613
Rhizosoleniaceae	plankton, phototrophic	Diatoms-centric	114.7	2
Rhodochaetaceae	benthic	Rhodophyta	13.24
Rhodomelaceae	benthic	Rhodophyta	205.74
Rivulariaceae	plankton, phototrophic bacteria	Cyanobacteria	239.4	1
Roseiflexaceae	plankton, phototrophic bacteria	Chloroflexi	273.02	10	0.676923	0.0157818	-0.572748	0.0699419
Rossellidae	benthic	Porifera	4.63
Salmonidae	pelagic	Fish	19906.5	15	0.618462	0.039319	-0.454965	0.195634
Salpingoecidae	plankton, heterotrophic	Choanoflagellates	366.22	5	0.520485	0.114483
Sarcinofilaceae	plankton, phototrophic	Chlorophyta	99.47	6
Sargassaceae	benthic	Phaeophyceae	25.78
Schizymeniaceae	benthic	Rhodophyta	14.22
Sciaenidae	pelagic	Fish	5830.74	8	0.583846	0.0605405	-0.512702	0.12422
Scyliorhinidae	pelagic	Chondrychthyes	1871.76	4
Scytonemataceae	plankton, phototrophic bacteria	Cyanobacteria	304.31	10
Sebastidae	pelagic	Fish	328.82	6	0.617811	0.0397503	-0.585948	0.05921
Selenastraceae	plankton, phototrophic	Chlorophyta	212.07	1	0.454406	0.196124	-0.508664	0.128872
Serranidae	pelagic	Fish	13109.8	19	0.460769	0.189133
Skeletonemataceae	plankton, phototrophic	Diatoms-centric	619.02	8
Solecurtidae	benthic	Mollusca-Bivalvia	12.24
Sparidae	pelagic	Fish	8734.88	5
Sphaerozoidae	plankton, heterotrophic	Rhizaria-Polycystinea-Colloidaria	558.23	6
Staurosiraceae	plankton, phototrophic	Diatoms-pennate	30.57	3
Stephanodiscaceae	plankton, phototrophic	Diatoms-centric	1012.53	19	-0.497692	0.142909
Strongylocentrotidae	benthic	Echinodermata	1003.76
Styelidae	benthic	Tunicata	430.99
Suessiaceae	plankton, heterotrophic	Dinoflagellata	16.5	4	-0.544141	0.0928772	0.598518	0.0516757
Synechococcaceae	plankton, phototrophic bacteria	Cyanobacteria	6490.45	1
Syngnathidae	pelagic	Fish	2392.52	18	0.657692	0.0217936	-0.4796	0.165816
Temoridae	pelagic	Crustaceae-Calanoid copepods	368.65	5
Tetragonicipitidae	benthic	Crustaceae-Harpactoid copepod	16.17
Tetrahymenidae	plankton, heterotrophic	Alveolata-Ciliophora	735.4	3
Tetraodontidae	pelagic	Fish	2486.61	13
Thalassiosiraceae	plankton, phototrophic	Diatoms-centric	1771.32	22	-0.512308	0.12422
Tolypothrichaceae	plankton, phototrophic bacteria	Cyanobacteria	90.18	2
Toxariaceae	plankton, phototrophic	Diatoms-pennate	28.34	5	-0.452795	0.1983
Trebouxiaceae	plankton, phototrophic	Chlorophyta	46.02	1			-0.465448	0.184081
Triceratiaceae	plankton, phototrophic	Diatoms-centric	35.83	2
Trichoplacidae	benthic	Placozoa	117.09
Triparmaceae	plankton, phototrophic	Stramenopiles	425.66	13
Ulnariaceae	plankton, phototrophic	Diatoms-pennate	51.38	17	-0.640892	0.027638	0.463138	0.186366
Ulotrichaceae	plankton, phototrophic	Chlorophyta	31.22	0
Ulvaceae	plankton, phototrophic	Chlorophyta	45.52	3	-0.622907	0.036484	0.66153	0.0208306
Vahlkampfiidae	plankton, heterotrophic	Discoba	500.48	4
Volvocaceae	plankton, phototrophic	Chlorophyta	274.81	3
Wrangeliaceae	benthic	Rhodophyta	15.67
Zosteraceae	benthic	Viridiplantae	159.77		0.731935	0.0265436	-0.685439	0.0969532
Zygnemataceae	plankton, phototrophic	Charophyceae	42.84	3
