# Supplementary material for: Marine ecosystem shifts with deglacial sea-ice loss inferred from ancient DNA shotgun sequencing
Source: Nat Commun. 2023 Mar 24;14:1650. doi: 10.1038/s41467-023-36845-x (PMC10039020; doi:10.1038/s41467-023-36845-x)
Supplement: Supplementary file 6 — Source Data [file 41467_2023_36845_MOESM6_ESM.xlsx]

## Sheet: Source_Data_Fig2
Source Data of Figure 2: Proportions of pelagic families per sample used for plotting the stratigraphic diagram and the ratios of reads assigned to pelagic to benthic taxa and phototrophic bacteria to phototrophic protists.
Age_ka	Aphanothecaceae	Apogonidae	Bacillariaceae	Balaenopteridae	Bathycoccaceae	Batrachoididae	Blenniidae	Bovichtidae	Callorhinchidae	Calotrichaceae	Carangidae	Chaetocerotaceae	Chamaesiphonaceae	Channichthyidae	Chlorobiaceae	Chloropicaceae	Clupeidae	Gadidae	Holocentridae	Lateolabracidae	Mustelidae	Nostocaceae	Phaeocystaceae	Salmonidae	Sciaenidae	Scyliorhinidae	Serranidae	Sparidae	Stephanodiscaceae	Synechococcaceae	Syngnathidae	Tetrahymenidae	Tetraodontidae	Thalassiosiraceae	Calanidae	Metridinidae	pelagic.benthic.ratio	smallbacteria.largerphytoplankton.ratio
1.08	0.233278	9.9052	0.138177	0.191112	0.248142	2.10329	2.49492	3.86546	1.26285	0.472016	2.37919	0.649022	0.0541483	2.14986	0.730623	1.41362	0.203094	2.8371	4.33141	2.73244	2.98332	1.10208	0.100258	21.0912	5.66191	0.938116	6.58062	6.26452	0.0764447	1.887	1.3936	0.235098	1.21356	0.227514	0	0	2.65914	1.32656
1.75	0.197634	4.68118	0.324132	0.159411	0.532535	2.64477	2.77719	2.53526	0.397846	0.819809	2.55665	1.12073	0.0567268	2.94009	1.31549	0.206734	0.43531	3.88821	4.99742	2.86653	3.51949	1.46959	0.132261	13.3281	4.03125	1.17215	7.95283	5.71637	0.261793	4.10086	1.88306	0.287274	1.76687	0.580161	0.00561201	0.00819051	3.60837	1.85253
2.36	0.343698	4.46913	0.221447	0.113605	0.474443	2.79994	2.99894	2.37904	0.292886	0.844229	3.35856	0.736842	0.0712877	2.58941	1.27044	0.0750796	0.580009	3.33156	4.50311	2.47368	3.88958	1.68239	0.33217	13.0373	3.97255	1.38086	9.0229	5.51813	0.206431	4.42591	1.71227	0.21902	1.53997	0.448809	0.0110723	0.0101623	3.65067	2.09448
2.99	0.388746	4.06067	0.604277	0.272107	1.00895	2.26346	2.73229	1.97467	0.329895	0.839527	2.76672	2.92856	0.0567268	2.5383	0.93933	0.124374	1.30623	4.118	6.12665	2.489	3.38283	1.34339	0.593812	11.5145	3.35022	1.00349	7.72547	5.17428	0.695586	4.23434	1.58365	0.472471	1.48051	1.13135	0.0345821	0.016836	3.67544	1.02156
3.66	0.449568	4.54194	0.300774	0.121644	0.671621	2.84074	2.94813	2.28606	0.347035	0.865463	3.36357	0.463977	0.0665858	2.73017	0.968755	0.222357	1.07826	3.49704	5.88063	2.98802	3.46868	1.66692	0.455635	12.8122	3.61823	1.56727	8.09874	5.22569	0.340816	4.25451	1.84059	0.203701	1.85606	0.769452	0	0.0166844	3.5503	1.86925
4.31	0.372516	4.46731	0.426058	0.198392	0.834218	2.82891	2.42409	2.6111	0.305324	0.960413	3.06522	0.559988	0.0552101	2.92219	1.06613	0.222054	1.53238	3.55438	5.56454	2.75762	3.22251	1.6651	0.452601	12.11	3.5879	1.29607	8.59867	5.69377	0.390717	3.77628	1.56924	0.486425	1.37191	1.0637	0.0110723	0.00894889	3.70261	1.78797
5.6	0.295162	3.96693	0.457607	0.215987	1.03489	2.83558	3.30957	2.35553	0.182618	0.947823	2.79736	0.51221	0.143182	2.53936	0.962384	0.278325	1.1221	3.53708	5.32444	2.62051	2.86288	2.32883	0.529198	13.1797	3.35826	1.27969	8.97528	5.27044	0.346125	3.47459	2.03261	0.310026	1.86895	0.734112	0.0320036	0.0119824	3.53379	1.66845
6.26	0.431367	4.79448	0.444562	0.161383	0.773093	2.30608	2.58168	2.56666	0.173517	0.726983	2.97391	5.92856	0.0360989	2.79675	0.656302	0.0682542	1.64341	3.59047	4.91385	2.74852	2.5659	1.4752	0.202336	12.0364	4.15698	1.24253	8.52889	5.66783	0.422418	2.72744	1.28712	0.307296	1.44365	0.976339	0.00591536	0.0259366	3.59776	0.80532
7.56	0.721826	4.44896	0.284848	0.109662	0.364477	2.35796	2.37267	2.56196	0.339451	1.07644	2.97239	2.51661	0.0670408	3.21144	1.37236	0.125891	1.01456	3.19066	3.63567	2.86728	3.69801	2.78265	0.212498	12.5227	3.61489	0.800698	10.1561	5.24101	0.279994	2.9501	1.3713	0.513272	1.59169	0.734719	0.00652207	0.00667374	3.78849	1.84757
8.29	0.416351	4.84923	0.419688	0.198241	0.696041	2.78599	3.28818	2.23479	0.258153	0.86152	2.72501	0.787047	0.1312	2.89231	0.965873	0.186258	2.03928	3.69119	4.69225	2.99151	3.37843	2.16336	0.285303	12.0191	3.66328	1.16973	8.48476	6.10875	0.527226	3.40118	1.47065	0.450629	1.44456	0.886698	0.0263916	0	3.40628	1.658
9.84	0.457303	4.07614	0.483543	0.192932	0.888366	2.8148	2.75064	2.41923	0.164568	1.09631	2.4978	2.50083	0.0471712	2.9592	0.769452	0.0368573	1.15759	2.92841	5.20673	2.83316	2.90778	1.86516	0.146064	11.7916	3.57834	0.97467	9.22372	4.79857	0.523586	3.74716	1.53799	0.6425	1.58623	0.989079	0.021538	0.00667374	3.59765	1.19661
10.73	0.843167	3.71379	0.581829	0.296223	2.08782	2.50993	2.68573	2.3032	0.331412	1.14561	2.15532	0.449871	0.0359472	3.06795	0.418929	0.233126	1.92401	4.53739	4.79054	2.82633	3.05976	2.00106	0.222357	12.0995	3.63416	1.32019	8.76505	5.22949	0.691036	3.47581	1.55316	0.27514	1.7059	0.925072	0.0298802	0.0124374	3.44289	1.19855
11.17	0.825269	5.11937	0.49234	0.3801	1.22585	2.80767	2.95935	3.10344	0.160018	1.16169	3.30745	0.23525	0.0285151	3.01365	0.576976	0.0617321	0.721523	4.64129	4.48309	2.56772	3.1535	1.89474	0.159108	12.2575	3.75686	1.17761	9.1626	5.94358	0.398301	3.14637	1.44744	0.472774	1.85788	0.660397	0.0251782	0.0189595	3.35534	1.86927
11.56	0.86971	4.63567	0.64159	1.30866	1.74336	2.01441	2.32914	2.53572	0.340513	0.763234	2.85257	0.349158	0.0459578	2.34688	0.831336	0.203549	0.820719	5.4614	4.67344	2.43971	2.88048	1.54664	0.355377	11.767	3.62111	0.940695	7.35871	5.11421	0.619142	6.18944	1.45852	0.342029	1.23737	1.12028	0.0169877	0.0741696	3.82703	1.45768
12.13	0.637798	4.26119	0.65615	0.0834218	0.860155	2.55741	2.82269	2.85803	0.131048	1.23388	3.3211	0.125739	0.0846352	2.84969	0.467617	0.119217	0.29956	4.41908	4.26877	3.20067	2.7555	2.16487	0.284544	12.0775	3.94873	1.41135	8.70408	4.85879	0.286213	2.57318	1.49295	2.21872	1.64326	0.532535	0.0177461	0.0371606	3.26744	2.08391
12.61	0.315638	3.04884	2.37434	0.214773	3.61535	1.66859	1.74079	1.57379	0.281207	0.790535	2.0728	0.75838	0.109358	1.96845	0.283027	0.134992	1.75292	11.1435	5.73335	2.11482	2.55741	1.54937	0.608221	10.6527	2.40892	1.07735	5.68315	4.40027	1.45306	7.08479	0.987563	0.228272	0.908691	2.2078	0.147732	0.0543	4.11954	0.785082
13.62	1.46079	4.72971	0.483543	0.16745	0.886546	2.48582	2.13605	2.69998	0.193842	0.917033	3.17261	0.0583953	0.0467162	3.13256	0.484908	0.0987411	0.849082	3.92917	4.70529	2.80282	3.05384	1.9551	0.146216	12.7723	3.66252	0.886091	8.7966	5.96875	0.330502	4.61065	1.48172	0.417109	1.59366	0.432732	0.0197179	0.0134992	2.81998	2.71758
14.03	1.79554	3.75383	1.10208	0.308206	1.6604	2.51888	2.37358	2.28197	0.206279	0.881541	2.11118	0.209313	0.0406492	2.52677	0.537995	0.107083	1.05142	6.85849	6.53906	2.38389	3.12544	1.48233	0.428485	10.366	3.45321	1.05688	7.97164	4.83589	0.571819	7.14864	1.37919	0.280601	1.26953	1.00849	0.0222964	0.158198	3.88366	1.48884
15.6	0.19005	3.08767	2.00789	0.408767	4.84969	1.93175	1.72319	1.50372	0.235098	0.48506	1.91885	0.244198	0.0260883	1.99954	0.433793	0.107993	0.258759	14.2425	8.30168	1.82406	2.14955	1.03109	2.01213	9.3622	2.66434	0.81268	5.45124	4.28803	1.5386	4.93326	0.899135	0.252692	1.18459	2.63992	0.0282117	0.0591536	4.81531	0.497604
15.91	0.210071	2.87775	2.19915	0.338844	6.39512	1.73608	1.85576	1.56439	0.21447	0.37464	1.85045	0.350523	0.0404975	1.89792	0.475049	0.114667	0.2398	12.5829	8.84726	1.8057	2.02715	1.07902	2.10951	8.81602	2.41089	0.732747	5.29334	4.09131	1.86425	5.10632	0.847566	0.276505	1.27696	2.88852	0.0664341	0.0853936	5.01825	0.441546
16.5	0.836342	4.1582	0.766116	0.318975	2.10557	2.51433	2.70636	1.81405	0.27696	0.795389	2.17898	0.0897922	1.66737	2.85136	0.67602	0.0932808	0.367359	7.64159	5.48916	2.91749	2.38086	1.79281	0.667526	12.2186	3.54285	0.992416	8.62794	5.41574	0.410435	3.00485	1.40209	0.464129	1.5835	0.774761	0.0354922	0.0197179	3.58069	1.71358
17.34	0.417716	4.08994	0.882603	0.514637	2.69741	2.42621	2.4303	1.84499	0.387229	0.782345	2.53011	0.200819	0.0238131	2.59669	0.644926	0.136357	0.22084	9.32368	7.48673	2.08858	2.74534	1.76263	1.28197	10.6126	3.24086	1.29091	7.32504	5.968	0.681784	2.67905	1.28682	0.424693	1.4303	1.30881	0.0273017	0.0248749	3.74194	0.899939
18.39	0.492492	3.82163	1.02988	0.417109	2.21462	2.60215	1.9187	1.8961	0.243288	0.832095	2.43121	0.283482	0.0069771	2.32717	0.400728	0.0280601	0.193539	13.8447	6.53951	1.69361	2.35674	1.63658	1.22721	10.772	3.16169	1.2627	7.01744	4.99833	0.89504	2.7966	1.2988	0.385712	1.62566	1.43304	0.0133475	0.0371606	3.67878	0.957984
19.3	0.387077	3.81526	1.00091	0.131655	3.02245	2.21022	2.35159	2.14606	0.316093	1.04126	2.41392	0.401031	0.104505	2.61292	0.677688	0.126498	0.429243	8.98089	6.80267	2.08373	2.41711	2.00379	1.8324	10.7449	3.34294	1.22918	7.06977	5.44547	1.04171	3.21902	1.14227	0.604581	1.11907	1.60428	0.027605	0.0480813	4.0988	0.892332
19.9	0.590171	4.81238	0.429395	0.253602	1.23495	3.13575	2.64538	2.2621	0.229941	1.33763	2.6965	0.129228	0.010769	2.87472	1.07417	0.151828	0.503261	3.62354	5.04277	2.56499	3.17321	2.44744	0.777643	11.9728	2.99545	1.37403	8.26938	5.24996	0.504626	3.49719	1.92947	0.383589	2.11558	0.788109	0.0292735	0.0119824	3.04157	1.91318

## Sheet: Source_Data_Fig3
Source Data of Figure 2: Adjacency matrix used for network computation. The upper triangle of the square matrix contains Spearman rank correlation coefficients whose Benjamini-Hochberg adjusted p-values were below the threshold of p<0.1.
	Acanthocerataceae	Acaryochloridaceae	Acipenseridae	Amphipleuraceae	Anarhichadidae	Anaulaceae	Anguillidae	Aphanizomenonaceae	Aphanothecaceae	Apogonidae	Apusomonadidae	Attheyaceae	Bacillariaceae	Balaenopteridae	Bathycoccaceae	Batrachoididae	Biddulphiaceae	Blenniidae	Bovichtidae	Brachionidae	Calanidae	Callorhinchidae	Calotrichaceae	Carangidae	Chaetocerotaceae	Channichthyidae	Chlamydomonadaceae	Chlorellaceae	Chlorobiaceae	Chlorococcaceae	Chlorodendraceae	Chloroflexaceae	Chloropicaceae	Chroococcaceae	Chroococcidiopsidaceae	Clupeidae	Coelacanthidae	Coleofasciculaceae	Coscinodiscaceae	Cyanidiaceae	Cyanothecaceae	Cyclopteridae	Cymatosiraceae	Delphinidae	Dermocarpellaceae	Desmidiaceae	Eirenidae	Entomoneidaceae	Eucalanidae
Acanthocerataceae	0	0	0	0	0	0	0	0	0	0	0	0	0	0	0	0	0	0	0	0	0	0	0	0	0.783555	0	0	0	0	0	0	0	0	0	0	0	0	0	0	0	0	0	0	0	0	0	0	0	0
Acaryochloridaceae	0	0	0	0	0	0	0	0	0	0	0	0	0	0	0	0	0	0	0	0	0	0	0	0	0	0	0	0	0	0	0	0	0	0	0	0	0.628582	0	0	0	0	0	0	0	0	0	0	0	0
Acipenseridae	0	0	0	0	0	0	0	0	0	0	0	0	0	0	0	0	0	0	0	0	0	0	0	0	0	0	0	0	0	0	0	0	0	0	0	0	0	0	0	0	0	0	0	0	0	0	0	0	0
Amphipleuraceae	0	0	0	0	0	0	0	0	0	0	0	0.555598	0.646142	0	0	0	0	0	0	0	0	0	0	0	0	0	0	0	0	0	0	0	0	0	0	0	0	0	0	0	0	0	0.637659	0	0	0	0	0	0
Anarhichadidae	0	0	0	0	0	0	0	0	0	0	0	0	0	0	0	0	0	0	0	0	0	0	0	0	0	0	0	0	0	0	0	0	0	0	0	0	0	0	0	0	0	0	0	0	0	0	0	0	0
Anaulaceae	0	0	0	0	0	0	0	0	0	0	0	0	0	0	0	0	0.609085	0	0	0	0	0	0	0	0	0	0	0	0	0	0	0	0	0	0	0	0	0	0	0	0	0	0	0	0	0	0	0	0
Anguillidae	0	0	0	0	0	0	0	0	0	0	0	0	0	0	0	0	0	0	0	0	0	0	0	0	0	0	0	0	0	0	0	0	0	0	0	0	0	0	0	0	0	0	0	0	0	0	0	0	0
Aphanizomenonaceae	0	0	0	0	0	0	0	0	0	0	0	0	0	0	0	0	0	0	0	0	0	0	0	0	0	0.557692	0	0	0	0	0	0	0	0	0	0	0	0	0	0	0	0	0	0	0	0	0	0	0
Aphanothecaceae	0	0	0	0	0	0	0	0	0	0	0	0	0	0	0	0	0	0	0	0	0	0	0	0	0	0	0	0	0	0	0	0	0	0.565109	0	0	0	0	0	0	0	0	0	0	0.640769	0	0.631931	0	0
Apogonidae	0	0	0	0	0	0	0	0	0	0	0	0	0	0	0	0	0	0	0.676923	0	0	0	0	0.63	0	0	0	0	0	0	0	0	0	0	0	0	0	0	0	0	0	0	0	0	0	0.630485	0	0	0
Apusomonadidae	0	0	0	0	0	0	0	0	0	0	0	0	0	0	0	0	0	0	0	0	0	0	0	0	0	0	0	0	0	0	0	0	0	0	0	0	0	0	0	0	0	0	0	0	0	0	0	0	0
Attheyaceae	0	0	0	0	0	0	0	0	0	0	0	0	0.733603	0	0.738462	0	0	0	0	0	0.623701	0	0	0	0	0	0	0	0	0	0	0	0	0	0	0	0	0	0	0	0	0	0.745959	0	0	0	0	0	0
Bacillariaceae	0	0	0	0	0	0	0	0	0	0	0	0	0	0.598577	0.918254	0	0	0	0	0	0.659226	0	0	0	0	0	0	0	0	0	0	0	0	0	0	0	0	0	0	0	0	0	0.625217	0	0	0	0	0	0
Balaenopteridae	0	0	0	0	0	0	0	0	0	0	0	0	0	0	0.711538	0	0	0	0	0	0	0	0	0	0	0	0	0	0	0	0	0	0	0	0	0	0	0	0	0	0	0	0	0	0	0	0	0	0
Bathycoccaceae	0	0	0	0	0	0	0	0	0	0	0	0	0	0	0	0	0	0	0	0	0.754521	0	0	0	0	0	0	0	0	0	0	0	0	0	0	0	0	0	0	0	0	0	0.662048	0	0	0	0	0	0
Batrachoididae	0	0	0	0	0	0	0	0	0	0	0	0	0	0	0	0	0	0.699231	0	0	0	0	0.633846	0	0	0	0	0	0	0	0	0	0	0	0	0	0	0	0	0	0	0.577692	0	0	0	0	0	0	0
Biddulphiaceae	0	0	0	0	0	0	0	0	0	0	0	0	0	0	0	0	0	0	0	0	0	0	0	0	0	0	0	0	0	0	0	0	0	0	0	0	0	0	0	0	0	0	0	0	0	0	0	0.564801	0
Blenniidae	0	0	0	0	0	0	0	0	0	0	0	0	0	0	0	0	0	0	0	0	0	0	0	0	0	0	0	0	0	0	0	0	0	0	0	0	0	0.568462	0	0	0	0	0	0	0	0	0	0	0
Bovichtidae	0	0	0	0	0	0	0	0	0	0	0	0	0	0	0	0	0	0	0	0	0	0	0	0.65	0	0	0	0	0	0	0	0	0	0	0	0	0	0	0	0	0	0	0	0	0	0	0.615413	0	0
Brachionidae	0	0	0	0	0	0	0	0	0	0	0	0	0	0	0	0	0	0	0	0	0	0	0.543633	0	0	0	0	0	0	0	0	0	0	0	0	0	0	0	0	0	0	0	0	0	0	0	0	0	0
Calanidae	0	0	0	0	0	0	0	0	0	0	0	0	0	0	0	0	0	0	0	0	0	0	0	0	0	0	0	0	0	0	0	0	0	0	0	0	0	0	0	0	0	0	0	0	0	0	0	0	0
Callorhinchidae	0	0	0	0	0	0	0	0	0	0	0	0	0	0	0	0	0	0	0	0	0	0	0	0	0	0	0	0	0	0	0	0	0.606154	0	0	0	0	0	0	0	0	0	0	0	0	0	0	0	0
Calotrichaceae	0	0	0	0	0	0	0	0	0	0	0	0	0	0	0	0	0	0	0	0	0	0	0	0	0	0.685385	0	0	0	0	0	0	0	0	0.546923	0	0	0	0	0	0	0	0	0	0	0	0	0	0
Carangidae	0	0	0	0	0	0	0	0	0	0	0	0	0	0	0	0	0	0	0	0	0	0	0	0	0	0	0	0	0	0	0	0	0	0	0	0	0	0	0	0	0	0	0	0	0	0	0	0	0
Chaetocerotaceae	0	0	0	0	0	0	0	0	0	0	0	0	0	0	0	0	0	0	0	0	0	0	0	0	0	0	0	0	0	0	0	0	0	0	0	0	0	0	0	0	0	0	0	0	0	0	0	0	0
Channichthyidae	0	0	0	0	0	0	0	0	0	0	0	0	0	0	0	0	0	0	0	0	0	0	0	0	0	0	0	0	0	0	0	0	0	0	0.683077	0	0	0	0	0	0	0	0	0	0	0	0	0	0
Chlamydomonadaceae	0	0	0	0	0	0	0	0	0	0	0	0	0	0	0	0	0	0	0	0	0	0	0	0	0	0	0	0	0	0	0	0	0	0	0	0	0	0	0	0	0	0	0	0	0	0	0	0	0
Chlorellaceae	0	0	0	0	0	0	0	0	0	0	0	0	0	0	0	0	0	0	0	0	0	0	0	0	0	0	0	0	0.577803	0	0	0	0	0	0	0	0	0	0	0	0	0	0	0	0	0	0	0	0
Chlorobiaceae	0	0	0	0	0	0	0	0	0	0	0	0	0	0	0	0	0	0	0	0	0	0	0	0	0	0	0	0	0	0	0	0	0	0	0	0	0	0	0	0	0	0	0	0	0	0	0	0	0
Chlorococcaceae	0	0	0	0	0	0	0	0	0	0	0	0	0	0	0	0	0	0	0	0	0	0	0	0	0	0	0	0	0	0	0	0	0	0	0	0	0	0	0	0	0	0	0	0	0	0	0	0	0
Chlorodendraceae	0	0	0	0	0	0	0	0	0	0	0	0	0	0	0	0	0	0	0	0	0	0	0	0	0	0	0	0	0	0	0	0	0	0	0	0	0	0	0	0	0	0	0	0	0	0	0	0	0
Chloroflexaceae	0	0	0	0	0	0	0	0	0	0	0	0	0	0	0	0	0	0	0	0	0	0	0	0	0	0	0	0	0	0	0	0	0	0	0	0	0	0	0	0	0	0	0	0	0	0	0	0	0
Chloropicaceae	0	0	0	0	0	0	0	0	0	0	0	0	0	0	0	0	0	0	0	0	0	0	0	0	0	0	0	0	0	0	0	0	0	0	0	0	0	0	0	0	0	0	0	0	0	0	0	0	0
Chroococcaceae	0	0	0	0	0	0	0	0	0	0	0	0	0	0	0	0	0	0	0	0	0	0	0	0	0	0	0	0	0	0	0	0	0	0	0	0	0	0	0	0	0	0	0	0	0	0	0	0	0
Chroococcidiopsidaceae	0	0	0	0	0	0	0	0	0	0	0	0	0	0	0	0	0	0	0	0	0	0	0	0	0	0	0	0	0	0	0	0	0	0	0	0	0	0	0	0	0	0	0	0	0	0	0	0	0
Clupeidae	0	0	0	0	0	0	0	0	0	0	0	0	0	0	0	0	0	0	0	0	0	0	0	0	0	0	0	0	0	0	0	0	0	0	0	0	0	0	0	0	0	0	0	0	0	0	0	0	0.561802
Coelacanthidae	0	0	0	0	0	0	0	0	0	0	0	0	0	0	0	0	0	0	0	0	0	0	0	0	0	0	0	0	0	0	0	0	0	0	0	0	0	0	0	0	0	0	0	0	0	0	0	0	0
Coleofasciculaceae	0	0	0	0	0	0	0	0	0	0	0	0	0	0	0	0	0	0	0	0	0	0	0	0	0	0	0	0	0	0	0	0	0	0	0	0	0	0	0	0.56	0	0	0	0	0	0	0	0	0
Coscinodiscaceae	0	0	0	0	0	0	0	0	0	0	0	0	0	0	0	0	0	0	0	0	0	0	0	0	0	0	0	0	0	0	0	0	0	0	0	0	0	0	0	0	0	0	0	0	0	0	0	0	0
Cyanidiaceae	0	0	0	0	0	0	0	0	0	0	0	0	0	0	0	0	0	0	0	0	0	0	0	0	0	0	0	0	0	0	0	0	0	0	0	0	0	0	0	0	0	0	0	0	0	0	0	0	0
Cyanothecaceae	0	0	0	0	0	0	0	0	0	0	0	0	0	0	0	0	0	0	0	0	0	0	0	0	0	0	0	0	0	0	0	0	0	0	0	0	0	0	0	0	0	0	0	0	0	0	0	0	0
Cyclopteridae	0	0	0	0	0	0	0	0	0	0	0	0	0	0	0	0	0	0	0	0	0	0	0	0	0	0	0	0	0	0	0	0	0	0	0	0	0	0	0	0	0	0	0	0	0	0	0	0	0
Cymatosiraceae	0	0	0	0	0	0	0	0	0	0	0	0	0	0	0	0	0	0	0	0	0	0	0	0	0	0	0	0	0	0	0	0	0	0	0	0	0	0	0	0	0	0	0	0	0	0	0	0	0
Delphinidae	0	0	0	0	0	0	0	0	0	0	0	0	0	0	0	0	0	0	0	0	0	0	0	0	0	0	0	0	0	0	0	0	0	0	0	0	0	0	0	0	0	0	0	0	0	0	0	0	0
Dermocarpellaceae	0	0	0	0	0	0	0	0	0	0	0	0	0	0	0	0	0	0	0	0	0	0	0	0	0	0	0	0	0	0	0	0	0	0	0	0	0	0	0	0	0	0	0	0	0	0	0	0	0
Desmidiaceae	0	0	0	0	0	0	0	0	0	0	0	0	0	0	0	0	0	0	0	0	0	0	0	0	0	0	0	0	0	0	0	0	0	0	0	0	0	0	0	0	0	0	0	0	0	0	0	0	0
Eirenidae	0	0	0	0	0	0	0	0	0	0	0	0	0	0	0	0	0	0	0	0	0	0	0	0	0	0	0	0	0	0	0	0	0	0	0	0	0	0	0	0	0	0	0	0	0	0	0	0	0
Entomoneidaceae	0	0	0	0	0	0	0	0	0	0	0	0	0	0	0	0	0	0	0	0	0	0	0	0	0	0	0	0	0	0	0	0	0	0	0	0	0	0	0	0	0	0	0	0	0	0	0	0	0
Eucalanidae	0	0	0	0	0	0	0	0	0	0	0	0	0	0	0	0	0	0	0	0	0	0	0	0	0	0	0	0	0	0	0	0	0	0	0	0	0	0	0	0	0	0	0	0	0	0	0	0	0
Euglenaceae	0	0	0	0	0	0	0	0	0	0	0	0	0	0	0	0	0	0	0	0	0	0	0	0	0	0	0	0	0	0	0	0	0	0	0	0	0	0	0	0	0	0	0	0	0	0	0	0	0
Eunotiaceae	0	0	0	0	0	0	0	0	0	0	0	0	0	0	0	0	0	0	0	0	0	0	0	0	0	0	0	0	0	0	0	0	0	0	0	0	0	0	0	0	0	0	0	0	0	0	0	0	0
Fonticulaceae	0	0	0	0	0	0	0	0	0	0	0	0	0	0	0	0	0	0	0	0	0	0	0	0	0	0	0	0	0	0	0	0	0	0	0	0	0	0	0	0	0	0	0	0	0	0	0	0	0
Fragilariaceae	0	0	0	0	0	0	0	0	0	0	0	0	0	0	0	0	0	0	0	0	0	0	0	0	0	0	0	0	0	0	0	0	0	0	0	0	0	0	0	0	0	0	0	0	0	0	0	0	0
Fundulidae	0	0	0	0	0	0	0	0	0	0	0	0	0	0	0	0	0	0	0	0	0	0	0	0	0	0	0	0	0	0	0	0	0	0	0	0	0	0	0	0	0	0	0	0	0	0	0	0	0
Gadidae	0	0	0	0	0	0	0	0	0	0	0	0	0	0	0	0	0	0	0	0	0	0	0	0	0	0	0	0	0	0	0	0	0	0	0	0	0	0	0	0	0	0	0	0	0	0	0	0	0
Gasterosteidae	0	0	0	0	0	0	0	0	0	0	0	0	0	0	0	0	0	0	0	0	0	0	0	0	0	0	0	0	0	0	0	0	0	0	0	0	0	0	0	0	0	0	0	0	0	0	0	0	0
Geminigeraceae	0	0	0	0	0	0	0	0	0	0	0	0	0	0	0	0	0	0	0	0	0	0	0	0	0	0	0	0	0	0	0	0	0	0	0	0	0	0	0	0	0	0	0	0	0	0	0	0	0
Gloeobacteraceae	0	0	0	0	0	0	0	0	0	0	0	0	0	0	0	0	0	0	0	0	0	0	0	0	0	0	0	0	0	0	0	0	0	0	0	0	0	0	0	0	0	0	0	0	0	0	0	0	0
Gloeomargaritaceae	0	0	0	0	0	0	0	0	0	0	0	0	0	0	0	0	0	0	0	0	0	0	0	0	0	0	0	0	0	0	0	0	0	0	0	0	0	0	0	0	0	0	0	0	0	0	0	0	0
Gobiidae	0	0	0	0	0	0	0	0	0	0	0	0	0	0	0	0	0	0	0	0	0	0	0	0	0	0	0	0	0	0	0	0	0	0	0	0	0	0	0	0	0	0	0	0	0	0	0	0	0
Gomontiellaceae	0	0	0	0	0	0	0	0	0	0	0	0	0	0	0	0	0	0	0	0	0	0	0	0	0	0	0	0	0	0	0	0	0	0	0	0	0	0	0	0	0	0	0	0	0	0	0	0	0
Gomphonemataceae	0	0	0	0	0	0	0	0	0	0	0	0	0	0	0	0	0	0	0	0	0	0	0	0	0	0	0	0	0	0	0	0	0	0	0	0	0	0	0	0	0	0	0	0	0	0	0	0	0
Gymnodiniaceae	0	0	0	0	0	0	0	0	0	0	0	0	0	0	0	0	0	0	0	0	0	0	0	0	0	0	0	0	0	0	0	0	0	0	0	0	0	0	0	0	0	0	0	0	0	0	0	0	0
Haematococcaceae	0	0	0	0	0	0	0	0	0	0	0	0	0	0	0	0	0	0	0	0	0	0	0	0	0	0	0	0	0	0	0	0	0	0	0	0	0	0	0	0	0	0	0	0	0	0	0	0	0
Hapalosiphonaceae	0	0	0	0	0	0	0	0	0	0	0	0	0	0	0	0	0	0	0	0	0	0	0	0	0	0	0	0	0	0	0	0	0	0	0	0	0	0	0	0	0	0	0	0	0	0	0	0	0
Heliobacteriaceae	0	0	0	0	0	0	0	0	0	0	0	0	0	0	0	0	0	0	0	0	0	0	0	0	0	0	0	0	0	0	0	0	0	0	0	0	0	0	0	0	0	0	0	0	0	0	0	0	0
Hemiaulaceae	0	0	0	0	0	0	0	0	0	0	0	0	0	0	0	0	0	0	0	0	0	0	0	0	0	0	0	0	0	0	0	0	0	0	0	0	0	0	0	0	0	0	0	0	0	0	0	0	0
Hexamitidae	0	0	0	0	0	0	0	0	0	0	0	0	0	0	0	0	0	0	0	0	0	0	0	0	0	0	0	0	0	0	0	0	0	0	0	0	0	0	0	0	0	0	0	0	0	0	0	0	0
Histionidae	0	0	0	0	0	0	0	0	0	0	0	0	0	0	0	0	0	0	0	0	0	0	0	0	0	0	0	0	0	0	0	0	0	0	0	0	0	0	0	0	0	0	0	0	0	0	0	0	0
Holocentridae	0	0	0	0	0	0	0	0	0	0	0	0	0	0	0	0	0	0	0	0	0	0	0	0	0	0	0	0	0	0	0	0	0	0	0	0	0	0	0	0	0	0	0	0	0	0	0	0	0
Hydridae	0	0	0	0	0	0	0	0	0	0	0	0	0	0	0	0	0	0	0	0	0	0	0	0	0	0	0	0	0	0	0	0	0	0	0	0	0	0	0	0	0	0	0	0	0	0	0	0	0
Hyellaceae	0	0	0	0	0	0	0	0	0	0	0	0	0	0	0	0	0	0	0	0	0	0	0	0	0	0	0	0	0	0	0	0	0	0	0	0	0	0	0	0	0	0	0	0	0	0	0	0	0
Klebsormidiaceae	0	0	0	0	0	0	0	0	0	0	0	0	0	0	0	0	0	0	0	0	0	0	0	0	0	0	0	0	0	0	0	0	0	0	0	0	0	0	0	0	0	0	0	0	0	0	0	0	0
Kryptoperidiniaceae	0	0	0	0	0	0	0	0	0	0	0	0	0	0	0	0	0	0	0	0	0	0	0	0	0	0	0	0	0	0	0	0	0	0	0	0	0	0	0	0	0	0	0	0	0	0	0	0	0
Lateolabracidae	0	0	0	0	0	0	0	0	0	0	0	0	0	0	0	0	0	0	0	0	0	0	0	0	0	0	0	0	0	0	0	0	0	0	0	0	0	0	0	0	0	0	0	0	0	0	0	0	0
Leptocylindraceae	0	0	0	0	0	0	0	0	0	0	0	0	0	0	0	0	0	0	0	0	0	0	0	0	0	0	0	0	0	0	0	0	0	0	0	0	0	0	0	0	0	0	0	0	0	0	0	0	0
Leptolyngbyaceae	0	0	0	0	0	0	0	0	0	0	0	0	0	0	0	0	0	0	0	0	0	0	0	0	0	0	0	0	0	0	0	0	0	0	0	0	0	0	0	0	0	0	0	0	0	0	0	0	0
Lithodesmiaceae	0	0	0	0	0	0	0	0	0	0	0	0	0	0	0	0	0	0	0	0	0	0	0	0	0	0	0	0	0	0	0	0	0	0	0	0	0	0	0	0	0	0	0	0	0	0	0	0	0
Mamiellaceae	0	0	0	0	0	0	0	0	0	0	0	0	0	0	0	0	0	0	0	0	0	0	0	0	0	0	0	0	0	0	0	0	0	0	0	0	0	0	0	0	0	0	0	0	0	0	0	0	0
Merismopediaceae	0	0	0	0	0	0	0	0	0	0	0	0	0	0	0	0	0	0	0	0	0	0	0	0	0	0	0	0	0	0	0	0	0	0	0	0	0	0	0	0	0	0	0	0	0	0	0	0	0
Metridinidae	0	0	0	0	0	0	0	0	0	0	0	0	0	0	0	0	0	0	0	0	0	0	0	0	0	0	0	0	0	0	0	0	0	0	0	0	0	0	0	0	0	0	0	0	0	0	0	0	0
Microcoleaceae	0	0	0	0	0	0	0	0	0	0	0	0	0	0	0	0	0	0	0	0	0	0	0	0	0	0	0	0	0	0	0	0	0	0	0	0	0	0	0	0	0	0	0	0	0	0	0	0	0
Microcystaceae	0	0	0	0	0	0	0	0	0	0	0	0	0	0	0	0	0	0	0	0	0	0	0	0	0	0	0	0	0	0	0	0	0	0	0	0	0	0	0	0	0	0	0	0	0	0	0	0	0
Monodopsidaceae	0	0	0	0	0	0	0	0	0	0	0	0	0	0	0	0	0	0	0	0	0	0	0	0	0	0	0	0	0	0	0	0	0	0	0	0	0	0	0	0	0	0	0	0	0	0	0	0	0
Mustelidae	0	0	0	0	0	0	0	0	0	0	0	0	0	0	0	0	0	0	0	0	0	0	0	0	0	0	0	0	0	0	0	0	0	0	0	0	0	0	0	0	0	0	0	0	0	0	0	0	0
Myxinidae	0	0	0	0	0	0	0	0	0	0	0	0	0	0	0	0	0	0	0	0	0	0	0	0	0	0	0	0	0	0	0	0	0	0	0	0	0	0	0	0	0	0	0	0	0	0	0	0	0
Naviculaceae	0	0	0	0	0	0	0	0	0	0	0	0	0	0	0	0	0	0	0	0	0	0	0	0	0	0	0	0	0	0	0	0	0	0	0	0	0	0	0	0	0	0	0	0	0	0	0	0	0
Nephroselmidaceae	0	0	0	0	0	0	0	0	0	0	0	0	0	0	0	0	0	0	0	0	0	0	0	0	0	0	0	0	0	0	0	0	0	0	0	0	0	0	0	0	0	0	0	0	0	0	0	0	0
Noelaerhabdaceae	0	0	0	0	0	0	0	0	0	0	0	0	0	0	0	0	0	0	0	0	0	0	0	0	0	0	0	0	0	0	0	0	0	0	0	0	0	0	0	0	0	0	0	0	0	0	0	0	0
Nostocaceae	0	0	0	0	0	0	0	0	0	0	0	0	0	0	0	0	0	0	0	0	0	0	0	0	0	0	0	0	0	0	0	0	0	0	0	0	0	0	0	0	0	0	0	0	0	0	0	0	0
Octopodidae	0	0	0	0	0	0	0	0	0	0	0	0	0	0	0	0	0	0	0	0	0	0	0	0	0	0	0	0	0	0	0	0	0	0	0	0	0	0	0	0	0	0	0	0	0	0	0	0	0
Oculatellaceae	0	0	0	0	0	0	0	0	0	0	0	0	0	0	0	0	0	0	0	0	0	0	0	0	0	0	0	0	0	0	0	0	0	0	0	0	0	0	0	0	0	0	0	0	0	0	0	0	0
Oscillatoriaceae	0	0	0	0	0	0	0	0	0	0	0	0	0	0	0	0	0	0	0	0	0	0	0	0	0	0	0	0	0	0	0	0	0	0	0	0	0	0	0	0	0	0	0	0	0	0	0	0	0
Ostreobiaceae	0	0	0	0	0	0	0	0	0	0	0	0	0	0	0	0	0	0	0	0	0	0	0	0	0	0	0	0	0	0	0	0	0	0	0	0	0	0	0	0	0	0	0	0	0	0	0	0	0
Otariidae	0	0	0	0	0	0	0	0	0	0	0	0	0	0	0	0	0	0	0	0	0	0	0	0	0	0	0	0	0	0	0	0	0	0	0	0	0	0	0	0	0	0	0	0	0	0	0	0	0
Oxytrichidae	0	0	0	0	0	0	0	0	0	0	0	0	0	0	0	0	0	0	0	0	0	0	0	0	0	0	0	0	0	0	0	0	0	0	0	0	0	0	0	0	0	0	0	0	0	0	0	0	0
Paralichthyidae	0	0	0	0	0	0	0	0	0	0	0	0	0	0	0	0	0	0	0	0	0	0	0	0	0	0	0	0	0	0	0	0	0	0	0	0	0	0	0	0	0	0	0	0	0	0	0	0	0
Parameciidae	0	0	0	0	0	0	0	0	0	0	0	0	0	0	0	0	0	0	0	0	0	0	0	0	0	0	0	0	0	0	0	0	0	0	0	0	0	0	0	0	0	0	0	0	0	0	0	0	0
Paulinellidae	0	0	0	0	0	0	0	0	0	0	0	0	0	0	0	0	0	0	0	0	0	0	0	0	0	0	0	0	0	0	0	0	0	0	0	0	0	0	0	0	0	0	0	0	0	0	0	0	0
Pedinomonadaceae	0	0	0	0	0	0	0	0	0	0	0	0	0	0	0	0	0	0	0	0	0	0	0	0	0	0	0	0	0	0	0	0	0	0	0	0	0	0	0	0	0	0	0	0	0	0	0	0	0
Pelagiidae	0	0	0	0	0	0	0	0	0	0	0	0	0	0	0	0	0	0	0	0	0	0	0	0	0	0	0	0	0	0	0	0	0	0	0	0	0	0	0	0	0	0	0	0	0	0	0	0	0
Petromyzontidae	0	0	0	0	0	0	0	0	0	0	0	0	0	0	0	0	0	0	0	0	0	0	0	0	0	0	0	0	0	0	0	0	0	0	0	0	0	0	0	0	0	0	0	0	0	0	0	0	0
Phaeocystaceae	0	0	0	0	0	0	0	0	0	0	0	0	0	0	0	0	0	0	0	0	0	0	0	0	0	0	0	0	0	0	0	0	0	0	0	0	0	0	0	0	0	0	0	0	0	0	0	0	0
Phaeodactylaceae	0	0	0	0	0	0	0	0	0	0	0	0	0	0	0	0	0	0	0	0	0	0	0	0	0	0	0	0	0	0	0	0	0	0	0	0	0	0	0	0	0	0	0	0	0	0	0	0	0
Phocidae	0	0	0	0	0	0	0	0	0	0	0	0	0	0	0	0	0	0	0	0	0	0	0	0	0	0	0	0	0	0	0	0	0	0	0	0	0	0	0	0	0	0	0	0	0	0	0	0	0
Plagiogrammaceae	0	0	0	0	0	0	0	0	0	0	0	0	0	0	0	0	0	0	0	0	0	0	0	0	0	0	0	0	0	0	0	0	0	0	0	0	0	0	0	0	0	0	0	0	0	0	0	0	0
Pleuronectidae	0	0	0	0	0	0	0	0	0	0	0	0	0	0	0	0	0	0	0	0	0	0	0	0	0	0	0	0	0	0	0	0	0	0	0	0	0	0	0	0	0	0	0	0	0	0	0	0	0
Prochloraceae	0	0	0	0	0	0	0	0	0	0	0	0	0	0	0	0	0	0	0	0	0	0	0	0	0	0	0	0	0	0	0	0	0	0	0	0	0	0	0	0	0	0	0	0	0	0	0	0	0
Prochlorotrichaceae	0	0	0	0	0	0	0	0	0	0	0	0	0	0	0	0	0	0	0	0	0	0	0	0	0	0	0	0	0	0	0	0	0	0	0	0	0	0	0	0	0	0	0	0	0	0	0	0	0
Pseudanabaenaceae	0	0	0	0	0	0	0	0	0	0	0	0	0	0	0	0	0	0	0	0	0	0	0	0	0	0	0	0	0	0	0	0	0	0	0	0	0	0	0	0	0	0	0	0	0	0	0	0	0
Pycnococcaceae	0	0	0	0	0	0	0	0	0	0	0	0	0	0	0	0	0	0	0	0	0	0	0	0	0	0	0	0	0	0	0	0	0	0	0	0	0	0	0	0	0	0	0	0	0	0	0	0	0
Radiococcaceae	0	0	0	0	0	0	0	0	0	0	0	0	0	0	0	0	0	0	0	0	0	0	0	0	0	0	0	0	0	0	0	0	0	0	0	0	0	0	0	0	0	0	0	0	0	0	0	0	0
Rajidae	0	0	0	0	0	0	0	0	0	0	0	0	0	0	0	0	0	0	0	0	0	0	0	0	0	0	0	0	0	0	0	0	0	0	0	0	0	0	0	0	0	0	0	0	0	0	0	0	0
Rhincodontidae	0	0	0	0	0	0	0	0	0	0	0	0	0	0	0	0	0	0	0	0	0	0	0	0	0	0	0	0	0	0	0	0	0	0	0	0	0	0	0	0	0	0	0	0	0	0	0	0	0
Rhizosoleniaceae	0	0	0	0	0	0	0	0	0	0	0	0	0	0	0	0	0	0	0	0	0	0	0	0	0	0	0	0	0	0	0	0	0	0	0	0	0	0	0	0	0	0	0	0	0	0	0	0	0
Rivulariaceae	0	0	0	0	0	0	0	0	0	0	0	0	0	0	0	0	0	0	0	0	0	0	0	0	0	0	0	0	0	0	0	0	0	0	0	0	0	0	0	0	0	0	0	0	0	0	0	0	0
Roseiflexaceae	0	0	0	0	0	0	0	0	0	0	0	0	0	0	0	0	0	0	0	0	0	0	0	0	0	0	0	0	0	0	0	0	0	0	0	0	0	0	0	0	0	0	0	0	0	0	0	0	0
Salmonidae	0	0	0	0	0	0	0	0	0	0	0	0	0	0	0	0	0	0	0	0	0	0	0	0	0	0	0	0	0	0	0	0	0	0	0	0	0	0	0	0	0	0	0	0	0	0	0	0	0
Salpingoecidae	0	0	0	0	0	0	0	0	0	0	0	0	0	0	0	0	0	0	0	0	0	0	0	0	0	0	0	0	0	0	0	0	0	0	0	0	0	0	0	0	0	0	0	0	0	0	0	0	0
Sarcinofilaceae	0	0	0	0	0	0	0	0	0	0	0	0	0	0	0	0	0	0	0	0	0	0	0	0	0	0	0	0	0	0	0	0	0	0	0	0	0	0	0	0	0	0	0	0	0	0	0	0	0
Sciaenidae	0	0	0	0	0	0	0	0	0	0	0	0	0	0	0	0	0	0	0	0	0	0	0	0	0	0	0	0	0	0	0	0	0	0	0	0	0	0	0	0	0	0	0	0	0	0	0	0	0
Scyliorhinidae	0	0	0	0	0	0	0	0	0	0	0	0	0	0	0	0	0	0	0	0	0	0	0	0	0	0	0	0	0	0	0	0	0	0	0	0	0	0	0	0	0	0	0	0	0	0	0	0	0
Scytonemataceae	0	0	0	0	0	0	0	0	0	0	0	0	0	0	0	0	0	0	0	0	0	0	0	0	0	0	0	0	0	0	0	0	0	0	0	0	0	0	0	0	0	0	0	0	0	0	0	0	0
Sebastidae	0	0	0	0	0	0	0	0	0	0	0	0	0	0	0	0	0	0	0	0	0	0	0	0	0	0	0	0	0	0	0	0	0	0	0	0	0	0	0	0	0	0	0	0	0	0	0	0	0
Selenastraceae	0	0	0	0	0	0	0	0	0	0	0	0	0	0	0	0	0	0	0	0	0	0	0	0	0	0	0	0	0	0	0	0	0	0	0	0	0	0	0	0	0	0	0	0	0	0	0	0	0
Serranidae	0	0	0	0	0	0	0	0	0	0	0	0	0	0	0	0	0	0	0	0	0	0	0	0	0	0	0	0	0	0	0	0	0	0	0	0	0	0	0	0	0	0	0	0	0	0	0	0	0
Skeletonemataceae	0	0	0	0	0	0	0	0	0	0	0	0	0	0	0	0	0	0	0	0	0	0	0	0	0	0	0	0	0	0	0	0	0	0	0	0	0	0	0	0	0	0	0	0	0	0	0	0	0
Sparidae	0	0	0	0	0	0	0	0	0	0	0	0	0	0	0	0	0	0	0	0	0	0	0	0	0	0	0	0	0	0	0	0	0	0	0	0	0	0	0	0	0	0	0	0	0	0	0	0	0
Sphaerozoidae	0	0	0	0	0	0	0	0	0	0	0	0	0	0	0	0	0	0	0	0	0	0	0	0	0	0	0	0	0	0	0	0	0	0	0	0	0	0	0	0	0	0	0	0	0	0	0	0	0
Staurosiraceae	0	0	0	0	0	0	0	0	0	0	0	0	0	0	0	0	0	0	0	0	0	0	0	0	0	0	0	0	0	0	0	0	0	0	0	0	0	0	0	0	0	0	0	0	0	0	0	0	0
Stephanodiscaceae	0	0	0	0	0	0	0	0	0	0	0	0	0	0	0	0	0	0	0	0	0	0	0	0	0	0	0	0	0	0	0	0	0	0	0	0	0	0	0	0	0	0	0	0	0	0	0	0	0
Suessiaceae	0	0	0	0	0	0	0	0	0	0	0	0	0	0	0	0	0	0	0	0	0	0	0	0	0	0	0	0	0	0	0	0	0	0	0	0	0	0	0	0	0	0	0	0	0	0	0	0	0
Synechococcaceae	0	0	0	0	0	0	0	0	0	0	0	0	0	0	0	0	0	0	0	0	0	0	0	0	0	0	0	0	0	0	0	0	0	0	0	0	0	0	0	0	0	0	0	0	0	0	0	0	0
Syngnathidae	0	0	0	0	0	0	0	0	0	0	0	0	0	0	0	0	0	0	0	0	0	0	0	0	0	0	0	0	0	0	0	0	0	0	0	0	0	0	0	0	0	0	0	0	0	0	0	0	0
Temoridae	0	0	0	0	0	0	0	0	0	0	0	0	0	0	0	0	0	0	0	0	0	0	0	0	0	0	0	0	0	0	0	0	0	0	0	0	0	0	0	0	0	0	0	0	0	0	0	0	0
Tetrahymenidae	0	0	0	0	0	0	0	0	0	0	0	0	0	0	0	0	0	0	0	0	0	0	0	0	0	0	0	0	0	0	0	0	0	0	0	0	0	0	0	0	0	0	0	0	0	0	0	0	0
Tetraodontidae	0	0	0	0	0	0	0	0	0	0	0	0	0	0	0	0	0	0	0	0	0	0	0	0	0	0	0	0	0	0	0	0	0	0	0	0	0	0	0	0	0	0	0	0	0	0	0	0	0
Thalassiosiraceae	0	0	0	0	0	0	0	0	0	0	0	0	0	0	0	0	0	0	0	0	0	0	0	0	0	0	0	0	0	0	0	0	0	0	0	0	0	0	0	0	0	0	0	0	0	0	0	0	0
Tolypothrichaceae	0	0	0	0	0	0	0	0	0	0	0	0	0	0	0	0	0	0	0	0	0	0	0	0	0	0	0	0	0	0	0	0	0	0	0	0	0	0	0	0	0	0	0	0	0	0	0	0	0
Toxariaceae	0	0	0	0	0	0	0	0	0	0	0	0	0	0	0	0	0	0	0	0	0	0	0	0	0	0	0	0	0	0	0	0	0	0	0	0	0	0	0	0	0	0	0	0	0	0	0	0	0
Trebouxiaceae	0	0	0	0	0	0	0	0	0	0	0	0	0	0	0	0	0	0	0	0	0	0	0	0	0	0	0	0	0	0	0	0	0	0	0	0	0	0	0	0	0	0	0	0	0	0	0	0	0
Triceratiaceae	0	0	0	0	0	0	0	0	0	0	0	0	0	0	0	0	0	0	0	0	0	0	0	0	0	0	0	0	0	0	0	0	0	0	0	0	0	0	0	0	0	0	0	0	0	0	0	0	0
Triparmaceae	0	0	0	0	0	0	0	0	0	0	0	0	0	0	0	0	0	0	0	0	0	0	0	0	0	0	0	0	0	0	0	0	0	0	0	0	0	0	0	0	0	0	0	0	0	0	0	0	0
Ulnariaceae	0	0	0	0	0	0	0	0	0	0	0	0	0	0	0	0	0	0	0	0	0	0	0	0	0	0	0	0	0	0	0	0	0	0	0	0	0	0	0	0	0	0	0	0	0	0	0	0	0
Ulvaceae	0	0	0	0	0	0	0	0	0	0	0	0	0	0	0	0	0	0	0	0	0	0	0	0	0	0	0	0	0	0	0	0	0	0	0	0	0	0	0	0	0	0	0	0	0	0	0	0	0
Vahlkampfiidae	0	0	0	0	0	0	0	0	0	0	0	0	0	0	0	0	0	0	0	0	0	0	0	0	0	0	0	0	0	0	0	0	0	0	0	0	0	0	0	0	0	0	0	0	0	0	0	0	0
Volvocaceae	0	0	0	0	0	0	0	0	0	0	0	0	0	0	0	0	0	0	0	0	0	0	0	0	0	0	0	0	0	0	0	0	0	0	0	0	0	0	0	0	0	0	0	0	0	0	0	0	0
Zygnemataceae	0	0	0	0	0	0	0	0	0	0	0	0	0	0	0	0	0	0	0	0	0	0	0	0	0	0	0	0	0	0	0	0	0	0	0	0	0	0	0	0	0	0	0	0	0	0	0	0	0
[truncated: 99 more columns]

## Sheet: Source_Data_Fig4
Source Data of Figure 4: Proportions of benthic families per sample used for plotting the stratigraphic diagram and the ratios of reads assigned to pelagic to benthic taxa and phototrophic bacteria to phototrophic protists.
Age_ka	Acanthasteridae	Acroporidae	Actiniidae	Aiptasiidae	Ampullariidae	Aplysiidae	Asteriidae	Asterinidae	Comatulidae	Daphniidae	Echinometridae	Edwardsiidae	Hyalellidae	Laminariaceae	Limulidae	Lingulidae	Merulinidae	Mytilidae	Nephtheidae	Niphatidae	Ostreidae	Palaemonidae	Pectinidae	Penaeidae	Pocilloporidae	Priapulidae	Strongylocentrotidae	Styelidae	Zosteraceae	pelagic.benthic.ratio	smallbacteria.largerphytoplankton.ratio
1.08	0.567156	0.611746	1.00163	0.442632	0.958129	2.86406	4.01359	2.17618	0.454595	0.576944	0.0282762	0.527461	0.486134	0.0309951	0.507885	0.378467	0.530723	0.154432	0.371941	0.329527	7.5106	13.2621	6.87004	48.9821	0.599239	0.348559	1.04785	0.301251	0.0712344	2.65914	1.32656
1.75	0.945079	1.12507	1.08211	0.755302	1.58836	2.58184	6.74008	0.998912	1.23382	0.914084	0	1.25666	1.2311	0.290375	1.49973	0.9913	1.323	0.62099	0.898314	1.58293	15.5976	24.0033	14.4785	7.2273	1.46166	0.632953	1.79119	0.85155	0.256661	3.60837	1.85253
2.36	1.45351	1.29309	0.864057	0.989668	1.46765	2.01305	7.52909	1.22784	0.78249	0.839043	0	1.64546	1.18597	0.0783034	0.927678	0.996194	1.54051	0.748777	1.25394	1.80207	18.4078	24.453	15.1278	1.38173	1.8907	0.867863	2.22023	0.498641	0.820011	3.65067	2.09448
2.99	0.711256	1.22458	0.794454	0.920065	1.61881	3.97879	7.49701	0.956498	1.41381	0.80696	0	1.19739	0.617727	0.246873	1.21098	0.835237	0.837955	2.56661	0.593257	1.1044	16.9032	22.5231	13.4149	1.69875	1.6547	1.05818	3.71506	0.97988	3.00598	3.67544	1.02156
3.66	1.27406	1.43176	0.65416	1.34312	1.99565	4.09842	7.99239	1.17238	1.47743	0.728657	0.0353453	1.45514	1.27732	0.255574	0.99565	0.941816	0.691136	1.12181	1.10223	1.09462	16.8902	24.1854	13.5383	1.96846	2.23328	1.59489	1.94617	0.858075	0.544318	3.5503	1.86925
4.31	1.2398	1.6373	1.00163	1.29309	1.31702	2.41164	7.46166	1.26808	1.67972	0.759652	0	1.25612	1.13377	0.129418	1.44753	1.1354	1.19467	0.991843	0.794454	0.740076	18.4622	22.6591	15.2523	1.80914	1.56444	2.70582	2.26101	0.920065	0.511147	3.70261	1.78797
5.6	0.497553	1.3143	0.791191	0.482871	1.36759	3.03589	10.31	0.507341	2.10984	0.65416	0	1.00109	1.45405	0.22621	1.66286	0.548124	0.544861	0.794997	0.990212	0.990212	15.7537	26.9462	14.4279	1.10604	2.41218	1.20228	1.28874	1.03317	0.163132	3.53379	1.66845
6.26	1.30234	1.70256	1.36215	1.04187	1.44046	2.49103	5.97716	0.799891	1.24524	1.20609	0	1.118	1.58619	0.0984231	2.47798	0.675911	1.06525	0.63839	0.840131	0.90919	17.6275	22.5155	15.0299	1.81566	1.67917	4.60196	2.01958	0.900489	0.0978793	3.59776	0.80532
7.56	0.716694	1.44209	1.5367	0.806417	1.30669	2.22838	7.14138	0.982599	1.04513	2.6509	0	1.78195	1.88363	0.05764	0.742795	1.2969	1.21044	0.358347	0.561718	1.0957	14.5133	23.932	14.2768	1.2485	1.51332	3.52964	1.78303	1.08265	0.194671	3.78849	1.84757
8.29	1.02338	1.85101	1.09679	0.972268	1.25122	2.56335	7.52964	0.571506	1.12344	0.995106	1.84122	1.19141	1.57477	0.0293638	1.14791	1.69657	1.20283	0.454595	0.665035	0.68298	16.6243	23.559	14.0533	1.2534	1.56389	2.11419	2.118	0.536161	0.741164	3.40628	1.658
9.84	0.561718	2.02828	1.00924	1.14301	1.05546	2.58184	7.63839	0.623165	1.69712	0.585101	0	0.513322	0.237629	0.045677	1.00218	0.789016	1.32626	0.373573	0.989125	0.755302	19.4589	24.5976	14.2599	1.38119	1.84013	2.01686	1.64763	1.16639	0.357803	3.59765	1.19661
10.73	0.762915	2.06688	1.12833	0.735726	2.03371	3.01849	6.75095	0.509516	1.58075	1.40131	0	1.35454	1.20718	0.0163132	1.30343	1.04948	0.855356	0.229473	0.517129	0.722132	17.1164	25.3284	14.2822	1.46982	4.82001	0.712344	2.24742	0.88907	1.10495	3.44289	1.19855
11.17	1.15226	2.53834	1.16259	1.01359	1.79935	1.42904	6.86623	0.764002	1.35345	0.958673	0	0.812942	0.746058	0.050571	1.68624	0.532355	0.987493	0.656879	0.450245	0.90484	17.739	25.8439	15.4894	1.39424	2.08102	1.84067	2.29255	0.973355	0.181077	3.35534	1.86927
11.56	1.14247	1.6547	1.26917	0.845024	1.75748	3.1006	7.42469	0.635128	1.22023	1.29146	0	0.887983	1.09407	0	0.924959	1.33768	0.853725	1.3192	0.980968	0.719413	18.1838	25.5008	15.4796	1.15389	1.69603	0.351278	2.31485	0.833061	0.0396955	3.82703	1.45768
12.13	1.44046	2.10169	0.857531	0.732463	1.52637	1.57314	8.03806	0.651441	0.392605	0.360522	0	1.44916	0.967374	0.103317	1.20609	0.642197	0.744426	0.0891789	0.421968	1.19304	18.9108	23.5786	17.1098	1.6199	2.21751	2.77542	1.15498	1.45949	0.0451332	3.26744	2.08391
12.61	0.679717	1.17618	0.958129	0.733007	0.636759	8.42469	6.56824	0.820011	1.07287	0.774334	0	1.2012	0.771071	3.55193	1.59217	0.812398	0.5764	1.15389	0.675911	0.568787	16.2746	21.8423	12.9772	1.34638	1.4236	3.75693	2.85101	1.5503	0.314845	4.11954	0.785082
13.62	0.718325	1.30506	0.717238	0.746601	0.953235	1.60957	5.83143	0.79826	0.851006	0.509516	0	0.470908	0.925503	0.0445895	1.44916	0.483959	1.0174	0.489396	1.40511	0.603589	15.5144	21.9244	12.3643	1.25992	2.20337	16.8184	1.56933	0.877107	0.0522023	2.81998	2.71758
14.03	1.13214	1.39315	1.82817	0.870038	1.2708	5.60359	5.23002	0.783034	1.26319	1.79337	0.0810223	0.779772	0.836868	0.033714	0.842306	0.82273	0.779772	1.73029	0.989125	0.884176	16.3165	23.1017	14.3986	1.32137	2.06688	3.77433	2.38173	1.10495	0	3.88366	1.48884
15.6	0.908646	1.26862	1.11256	0.952148	1.25177	12.0174	6.1093	0.633496	1.03589	1.09135	0	0.840674	0.756389	0.544318	1.24144	0.947798	1.00761	0.148994	0.542686	0.716694	16.9299	23.1903	13.4138	1.32083	1.23328	0.767265	3.57096	0.903208	0.0206634	4.81531	0.497604
15.91	1.0783	1.24742	1.14682	0.498641	1.37738	11.4127	5.94345	1.04405	1.39315	0.819467	0.0141381	0.843937	0.719956	0.508428	0.959217	0.82708	1.00272	0.131049	0.704187	0.616096	16.6215	24.2887	13.3208	1.24035	1.52855	0.821098	3.60903	0.97553	0	5.01825	0.441546
16.5	0.551387	1.00924	0.8559	1.74279	1.58456	5.28657	9.10005	0.464383	1.92333	0.754214	0.0271887	0.812398	0.529636	0.239804	0.868407	0.524742	1.18923	0.0266449	0.983687	0.402393	17.5677	25.8314	14.5574	0.997281	1.35835	2.41218	2.41327	1.07993	0.0826536	3.58069	1.71358
17.34	0.831974	0.887439	1.36922	0.957042	1.28331	4.87221	6.7379	0.525829	0.99565	0.774334	0	1.13322	1.68298	0.405655	1.18923	0.482327	1.53018	0.133768	0.752039	0.546493	16.5264	24.826	12.7134	1.16204	1.5155	6.89288	2.47471	1.0658	0.0522023	3.74194	0.899939
18.39	1.68461	0.885808	1.49973	0.258293	0.675367	5.68842	8.22186	0.539967	0.561718	0.555737	0	1.28439	0.624796	0.23926	1.36324	0.284937	1.51223	0.299619	1.50571	0.428494	16.944	29.5476	14.9755	1.01631	2.03752	0.582926	1.86786	0.462751	0.0304513	3.67878	0.957984
19.3	0.830343	1.59652	1.34475	0.805873	1.08592	6.87656	6.58673	0.45677	0.965198	0.715606	0	0.955954	1.18216	0.349103	1.16585	0.738989	0.926591	0.201196	0.866232	0.382817	16.5329	25.3371	14.5351	1.40783	2.34421	2.15063	2.60903	0.991843	0	4.0988	0.892332
19.9	0.956498	1.47308	0.646003	0.80696	0.604133	2.59326	6.6199	0.362697	0.833605	1.37955	0	0.97988	1.36813	0.137575	1.00381	1.19141	0.987493	0.266449	0.682436	0.376291	14.9804	24.4992	13.8657	2.15878	2.02882	11.4187	1.38662	1.14138	0	3.04157	1.91318
